# Supplementary material
Source: publisher figshare collection journal article supplement (https://frontiersin.figshare.com/ndownloader/files/12713651)
Supplement: Supplementary file 2 [file 12713651]

| General rules (5 rules) |   |   |   |   |   | Specific rules (9 rules) |   |   |   |   |   |   |   |   |   |
|-------------------------|---|---|---|---|---|--------------------------|---|---|---|---|---|---|---|---|---|
| Items                   | 1 | 2 | 3 | 4 | 5 | Items                    | 1 | 2 | 3 | 4 | 5 | 6 | 7 | 8 | 9 |
| 1                       | 1 |   |   |   |   | 1                        | 1 |   |   |   |   |   |   |   |   |
| 2                       |   |   | 1 | 1 |   | 2                        |   |   |   |   |   |   | 1 | 1 |   |
| 3                       | 1 |   |   | 1 | 1 | 3                        |   | 1 |   |   |   |   |   | 1 | 1 |
| 4                       |   | 1 | 1 | 1 | 1 | 4                        |   |   |   | 1 |   |   | 1 | 1 | 1 |
| 5                       |   | 1 |   |   |   | 5                        |   |   |   |   | 1 |   |   |   |   |
| 6                       | 1 |   |   |   | 1 | 6                        |   |   | 1 |   |   |   |   |   | 1 |
| 7                       |   | 1 | 1 | 1 |   | 7                        |   |   |   |   |   | 1 | 1 | 1 |   |
| 8                       | 1 | 1 |   | 1 | 1 | 8                        |   | 1 |   | 1 |   |   |   | 1 | 1 |
| 9                       |   |   | 1 |   |   | 9                        |   |   |   |   |   |   | 1 |   |   |
| 10                      |   |   | 1 |   | 1 | 10                       |   |   |   |   |   |   | 1 |   | 1 |
| 11                      | 1 | 1 |   | 1 |   | 11                       |   | 1 |   |   |   | 1 |   | 1 |   |
| 12                      | 1 | 1 |   | 1 | 1 | 12                       |   |   | 1 |   | 1 |   |   | 1 | 1 |
| 13                      |   |   |   | 1 |   | 13                       |   |   |   |   |   |   |   | 1 |   |
| 14                      | 1 |   |   | 1 |   | 14                       | 1 |   |   |   |   |   |   | 1 |   |
| 15                      |   | 1 | 1 |   | 1 | 15                       |   |   |   | 1 |   |   | 1 |   | 1 |
| 16                      |   | 1 | 1 | 1 | 1 | 16                       |   |   |   |   | 1 |   | 1 | 1 | 1 |
| 17                      |   |   |   |   | 1 | 17                       |   |   |   |   |   |   |   |   | 1 |
| 18                      | 1 | 1 |   |   |   | 18                       |   | 1 |   |   |   | 1 |   |   |   |
| 19                      |   | 1 |   | 1 | 1 | 19                       |   |   |   | 1 |   |   |   | 1 | 1 |
| 20                      |   | 1 | 1 | 1 | 1 | 20                       |   |   |   |   |   | 1 | 1 | 1 | 1 |
| 21                      |   |   |   | 1 | 1 | 21                       |   |   |   |   |   |   |   | 1 | 1 |
| 22                      |   |   | 1 | 1 | 1 | 22                       |   |   |   |   |   |   | 1 | 1 | 1 |
| 23                      | 1 | 1 |   | 1 | 1 | 23                       | 1 |   |   |   | 1 |   |   | 1 | 1 |
