# Supplementary material
Source: publisher figshare collection journal article supplement (https://frontiersin.figshare.com/ndownloader/files/12713651)
Supplement: Supplementary file 4 [file 12713651]

## Few examples of IMak-generated items

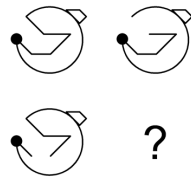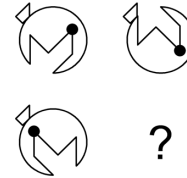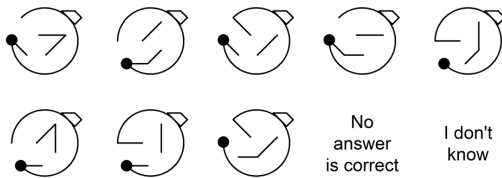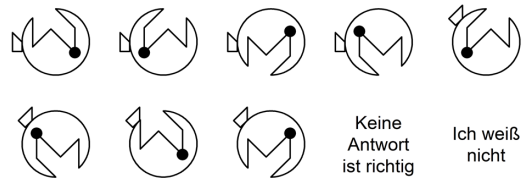

A. Item with subtraction rule plotted with default values.

B. Item with reflection rule and shape form changes, plus German language changes, plus German language.

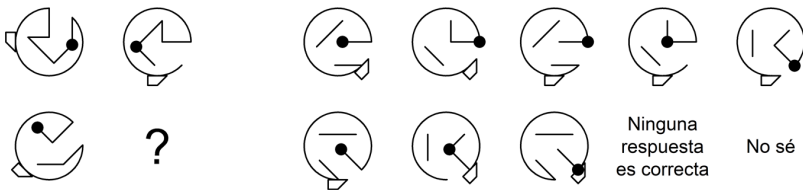

C. Item with four rules, plot mode and shape form changes, plus Spanish language.
